# Supplementary material
Source: PubMed Central journal article supplement (PMC4469132)
Supplement: NIHMS696000-supplement-2.pdf [file NIHMS696000-supplement-2.pdf]

**Table S1.** Structure refinement statistics.

|                        | Dark used in I <sub>120K</sub>             | Dark2 used in I <sub>180K</sub>           | Dark (W285F)                               |
|------------------------|--------------------------------------------|-------------------------------------------|--------------------------------------------|
| Crystal ID             | WT-15                                      | WT-32                                     | W285F-01                                   |
| R-factor               | 0.147                                      | 0.149                                     | 0.152                                      |
| Free R-factor          | 0.181                                      | 0.182                                     | 0.184                                      |
| Resolution (Å)         | 1.67                                       | 1.61                                      | 1.75                                       |
| # of reflections       | 134,809                                    | 165,032                                   | 127,771                                    |
| Contents in ASU        | 4 molecules + 1600 waters + 20 Mg ion      |                                           |                                            |
| RMSD (bond length) (Å) | 0.006                                      | 0.006                                     | 0.006                                      |
| RMSD (bond angle) (°)  | 1.046                                      | 1.047                                     | 1.054                                      |
| Cell parameters        | 112.5 77.3 189.3 (Å)<br>90.0 95.6 90.0 (°) | 113.3 76.8 191.3 (Å)<br>90.0 97.0 90.0(°) | 111.8 79.1 189.3 (Å)<br>90.00 95.2 90.0(°) |
| PDB accession ID*      | 4NAA                                       | 4NBM                                      | 4NC4                                       |

**Instruction for PDB users:**

The coordinates of each dark reference structure along with its associated structure factor amplitudes of the dark and UV data sets (collected from the same crystal) as well as their difference amplitudes are deposited in Protein Data Bank under the same accession number. Users are advised to download both the coordinates and structural factors to calculate the ( $F_{UV}-F_{Dark}$ ) difference map for proper examination of light-induced structural changes at each temperature.

**Table S2.** Data collection statistics in T-scan and control experiments.

| Crystal ID                      | WT-20 |      | WT-33 |      | WT-15 |      | WT-16 |      | WT-21 |      | WT-22 |      | WT-32* |      | WT-41<br>(control) |          |          | W285F |      |      |
|---------------------------------|-------|------|-------|------|-------|------|-------|------|-------|------|-------|------|--------|------|--------------------|----------|----------|-------|------|------|
|                                 | 100K  |      | 110K  |      | 120K  |      | 140K  |      | 160K  |      | 180K  |      | 180K   |      |                    | 120<br>K | 180<br>K | 120K  |      |      |
| Temperature                     | DK    | UV   | DK     | UV   | DK                 | NO UV    |          | DK    | UV   |      |
| Resolution (Å)                  | 1.75  | 1.75 | 1.70  | 1.70 | 1.67  | 1.73 | 1.75  | 1.9  | 1.90  | 1.9  | 1.9   | 1.9  | 1.9    | 1.61 | 1.8                | 1.8      | 1.85     | 1.85  | 1.75 | 1.90 |
| Rmerge (%)                      | 4.4   | 4.2  | 4.9   | 4.6  | 3.9   | 4.8  | 5.5   | 6.8  | 6.0   | 6.4  | 6.5   | 5.4  | 3.8    | 4.3  | 8.1                | 12.6     | 5.1      | 4.7   | 7.5  |      |
| Completeness (%)                | 86.7  | 86.8 | 87.0  | 80.5 | 82.8  | 82.5 | 97.3  | 97.9 | 98.8  | 98.5 | 98.4  | 91.6 | 87.9   | 87.6 | 95.5               | 90.3     | 87.6     | 99.8  | 99.5 |      |
| R-diff (DK vs. DK) <sup>1</sup> | 0.22  |      | 0.34  |      | Ref   |      | 0.09  |      | 0.11  |      | 0.11  |      | 0.34   |      | 0.25               |          |          | 0.19  |      |      |
| R-diff (DK vs. UV) <sup>2</sup> | 0.049 |      | 0.055 |      | 0.072 |      | 0.124 |      | 0.086 |      | 0.189 |      | 0.169  |      |                    | 0.08     | 0.21     | 0.084 |      |      |
| Redundancy                      | 4.6   | 4.6  | 5.2   | 5.2  | 4.6   | 4.6  | 2.9   | 3.1  | 4.9   | 4.9  | 4.4   | 4.2  | 4.4    | 4.5  | 3.0                | 2.9      | 2.7      | 3.6   | 3.6  |      |

\*Crystal WT-32 exhibits slightly different cell parameters and was used to refine the I<sub>180K</sub> structure. See also Fig. S2c and Table S2.

<sup>1</sup> R-diff (Dark vs. Dark) refers to the difference R-factor between two dark sets from different crystals calculated by ScaleIt in CCP4. Crystal WT-15 was used as the reference.

<sup>2</sup> R-diff (Dark vs. UV) refers to the difference R-factor between the dark and UV data sets from different volumes of the same crystal calculated by ScaleIt in CCP4.

**Table S3. Time-resolved fluorescence decay experiments.** Lifetimes ( $\tau$ ) of distinct fluorescence decay species and their relative populations ( $\alpha_i$ ) extracted from 3-exponential fitting of time-resolved data from WT and W285F (10 protein samples) *AtUVR8* samples. The excitation and emission wavelengths were set at 320nm and 350nm, respectively. See SI Methods for experimental and statistical details. Time-courses from 10 independent samples show good agreement in both WT and W285F.  $\chi^2$  is residual of the least-squares fitting procedure.

WT

| Sample | $\tau_1$ (ns) | $\alpha_1$ | $\tau_2$ (ns) | $\alpha_2$ | $\tau_3$ (ns) | $\alpha_3$ | $\chi^2$ |
|--------|---------------|------------|---------------|------------|---------------|------------|----------|
| 1      | 0.076         | 77.3%      | 1.51          | 16.3%      | 8.00          | 6.4%       | 1.014    |
| 2      | 0.072         | 77.2%      | 1.45          | 15.8%      | 8.00          | 7.0%       | 1.048    |
| 3      | 0.072         | 78.8%      | 1.64          | 15.8%      | 9.52          | 5.4%       | 1.067    |
| 4      | 0.068         | 78.4%      | 1.53          | 15.1%      | 7.93          | 6.5%       | 1.010    |
| 5      | 0.051         | 78.5%      | 1.42          | 15.0%      | 7.42          | 6.5%       | 1.093    |
| 6      | 0.067         | 78.3%      | 1.49          | 15.2%      | 8.18          | 6.5%       | 1.082    |
| 7      | 0.092         | 77.6%      | 1.56          | 15.7%      | 8.96          | 6.7%       | 1.095    |
| 8      | 0.061         | 78.0%      | 1.43          | 15.3%      | 7.43          | 6.7%       | 1.081    |
| 9      | 0.050         | 81.1%      | 1.55          | 13.0%      | 7.83          | 5.9%       | 1.080    |
| 10     | 0.063         | 79.2%      | 1.53          | 14.6%      | 8.84          | 6.2%       | 1.036    |

W285F

| Sample | $\tau_1$ (ns) | $\alpha_1$ | $\tau_2$ (ns) | $\alpha_2$ | $\tau_3$ (ns) | $\alpha_3$ | $\chi^2$ |
|--------|---------------|------------|---------------|------------|---------------|------------|----------|
| 1      | 0.055         | 4.2%       | 2.88          | 1.5%       | 12.92         | 94.3%      | 1.124    |
| 2      | 0.036         | 4.6%       | 4.10          | 2.1%       | 12.99         | 92.3%      | 1.142    |
| 3      | 0.051         | 3.8%       | 2.20          | 1.2%       | 12.79         | 95.0%      | 1.066    |
| 4      | 0.039         | 4.6%       | 2.75          | 1.6%       | 12.91         | 93.8%      | 1.075    |
| 5      | 0.081         | 3.3%       | 4.19          | 2.5%       | 12.98         | 94.2%      | 1.154    |
| 6      | 0.028         | 5.5%       | 3.73          | 2.1%       | 12.97         | 92.4%      | 1.123    |
| 7      | 0.053         | 3.8%       | 3.79          | 2.5%       | 13.02         | 93.7%      | 1.082    |
| 8      | 0.065         | 3.6%       | 3.02          | 2.0%       | 12.98         | 94.4%      | 1.158    |
| 9      | 0.041         | 5.0%       | 2.02          | 1.2%       | 12.84         | 93.8%      | 1.088    |
| 10     | 0.042         | 5.5%       | 3.05          | 1.6%       | 12.89         | 92.9%      | 1.047    |

**Table S4.** Geometric parameters of 13 Trp residues in the dark structure of *AtUVR8*.

|                            | Subunit A  |          |            |        | Subunit B  |          |            |        | Subunit C  |          |            |        | Subunit D  |          |            |        |
|----------------------------|------------|----------|------------|--------|------------|----------|------------|--------|------------|----------|------------|--------|------------|----------|------------|--------|
|                            | Side chain |          | Main chain |        | Side chain |          | Main chain |        | Side chain |          | Main chain |        | Side chain |          | Main chain |        |
| Torsional angles (°)       | $\chi_1$   | $\chi_2$ | $\phi$     | $\psi$ |
| <b>Group 1 (G/S-W-G)</b>   |            |          |            |        |            |          |            |        |            |          |            |        |            |          |            |        |
| Trp39                      | 64         | 96       | -159       | 165    | 61         | 99       | -159       | 165    | 61         | 97       | -159       | 167    | 62         | 99       | -160       | 165    |
| Trp92                      | 59         | 98       | -162       | 161    | 57         | 100      | -162       | 161    | 57         | 97       | -161       | 161    | 59         | 98       | -163       | 162    |
| Trp144                     | 62         | 96       | -160       | 157    | 65         | 92       | -158       | 159    | 60         | 96       | -159       | 160    | 63         | 95       | -164       | 160    |
| Trp196                     | 62         | 102      | -160       | 168    | 67         | 99       | -162       | 167    | 63         | 99       | -159       | 168    | 63         | 101      | -161       | 169    |
| Trp300                     | 57         | 97       | -162       | 170    | 56         | 97       | -162       | 169    | 58         | 95       | -163       | 168    | 57         | 96       | -162       | 167    |
| Trp352                     | 59         | 96       | -158       | 163    | 58         | 57       | -157       | 161    | 59         | 97       | -159       | 163    | 59         | 95       | -156       | 161    |
| <b>Group 2 (G-W-G/S/N)</b> |            |          |            |        |            |          |            |        |            |          |            |        |            |          |            |        |
| Trp94                      | -170       | 1        | -66        | 131    | -166       | -1       | -61        | 127    | -170       | 0        | -66        | 130    | -170       | 2        | -64        | 131    |
| Trp198                     | -173       | 97       | -61        | 124    | -175       | 99       | -63        | 122    | -176       | 103      | -62        | 127    | -176       | 99       | -65        | 123    |
| Trp250                     | -158       | 23       | -80        | 131    | -153       | 20       | -73        | 130    | -158       | 26       | -77        | 132    | -155       | 22       | -74        | 132    |
| Trp302                     | -167       | 47       | -67        | 135    | -165       | 40       | -65        | 133    | -170       | 49       | -68        | 136    | -168       | 49       | -66        | 134    |
| <b>Group 3 (G-W-R)</b>     |            |          |            |        |            |          |            |        |            |          |            |        |            |          |            |        |
| Trp233                     | -156       | 55       | -61        | -47    | -152       | 53       | -57        | -51    | -152       | 51       | -61        | -48    | -154       | 54       | -61        | -52    |
| Trp285                     | -162       | 32       | -63        | -52    | -166       | 35       | -64        | -54    | -161       | 32       | -62        | -55    | -164       | 36       | -61        | -55    |
| Trp337                     | -80        | 25       | -75        | -41    | -78        | 26       | -75        | -41    | -79        | 27       | -72        | -40    | -79        | 27       | -75        | -39    |
